# Supplementary material
Source: PubMed Central journal article supplement (PMC3974915)

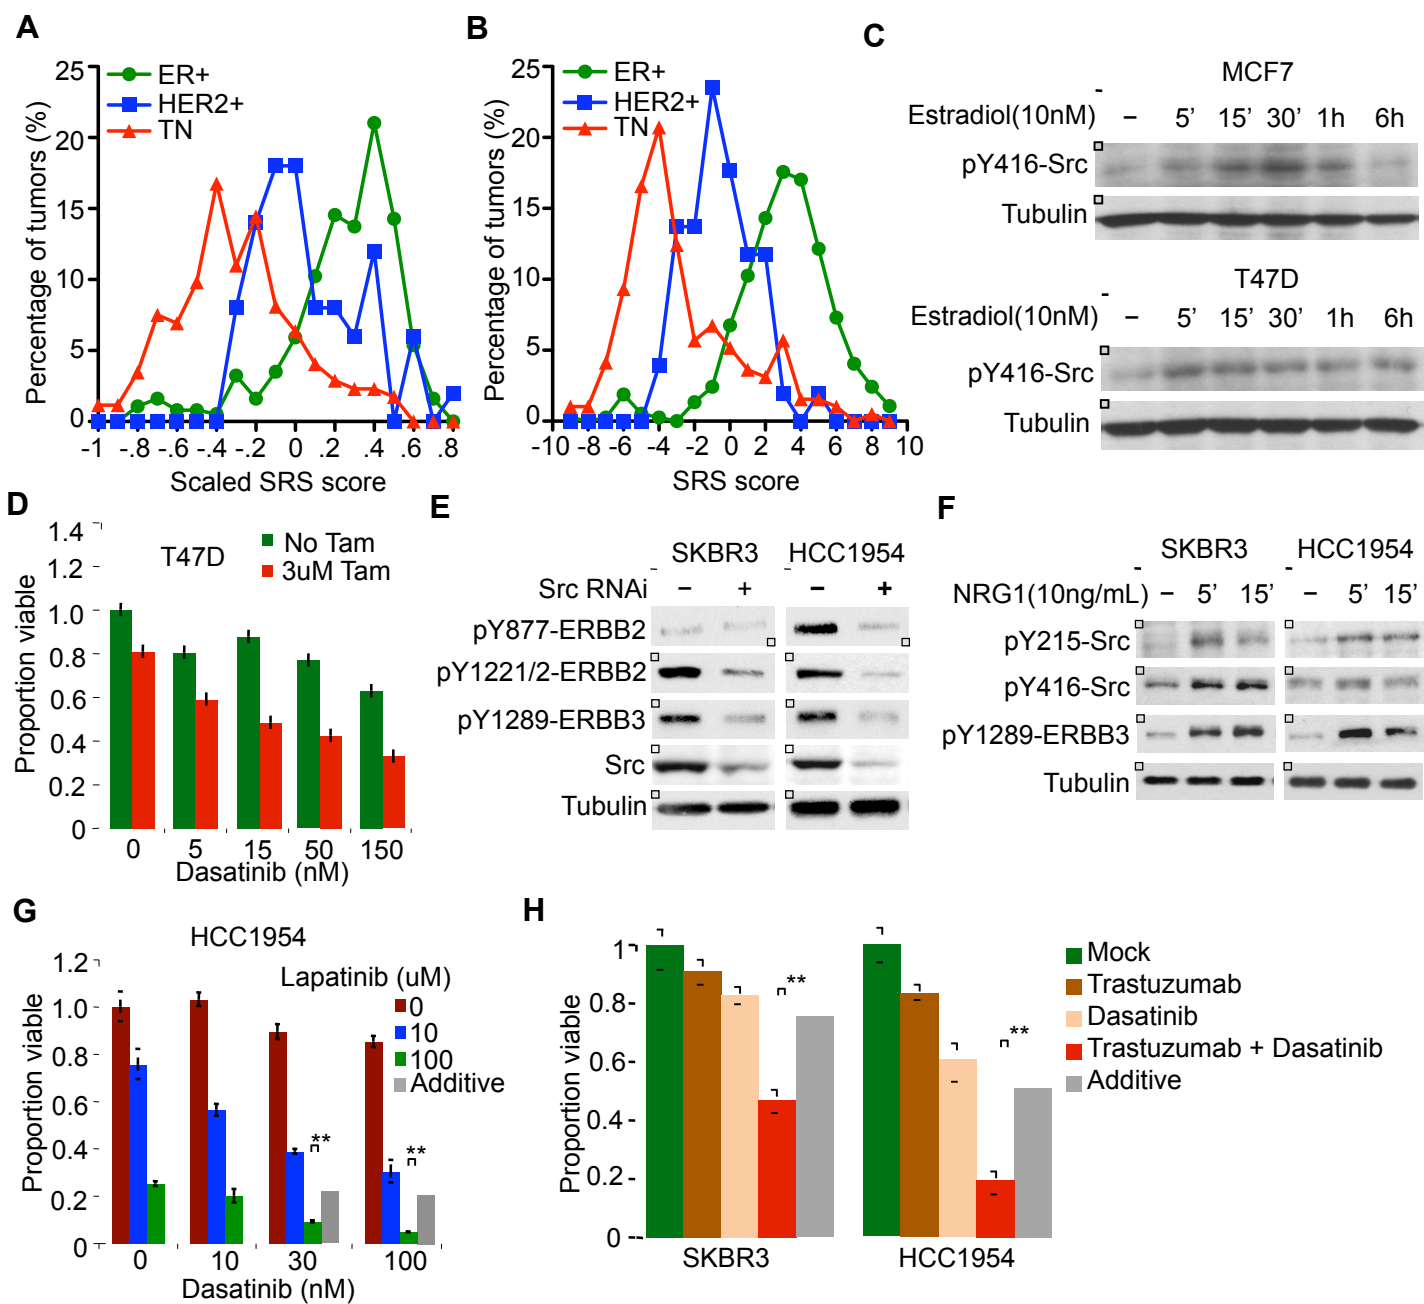

Figure S1, Related to Figure 1

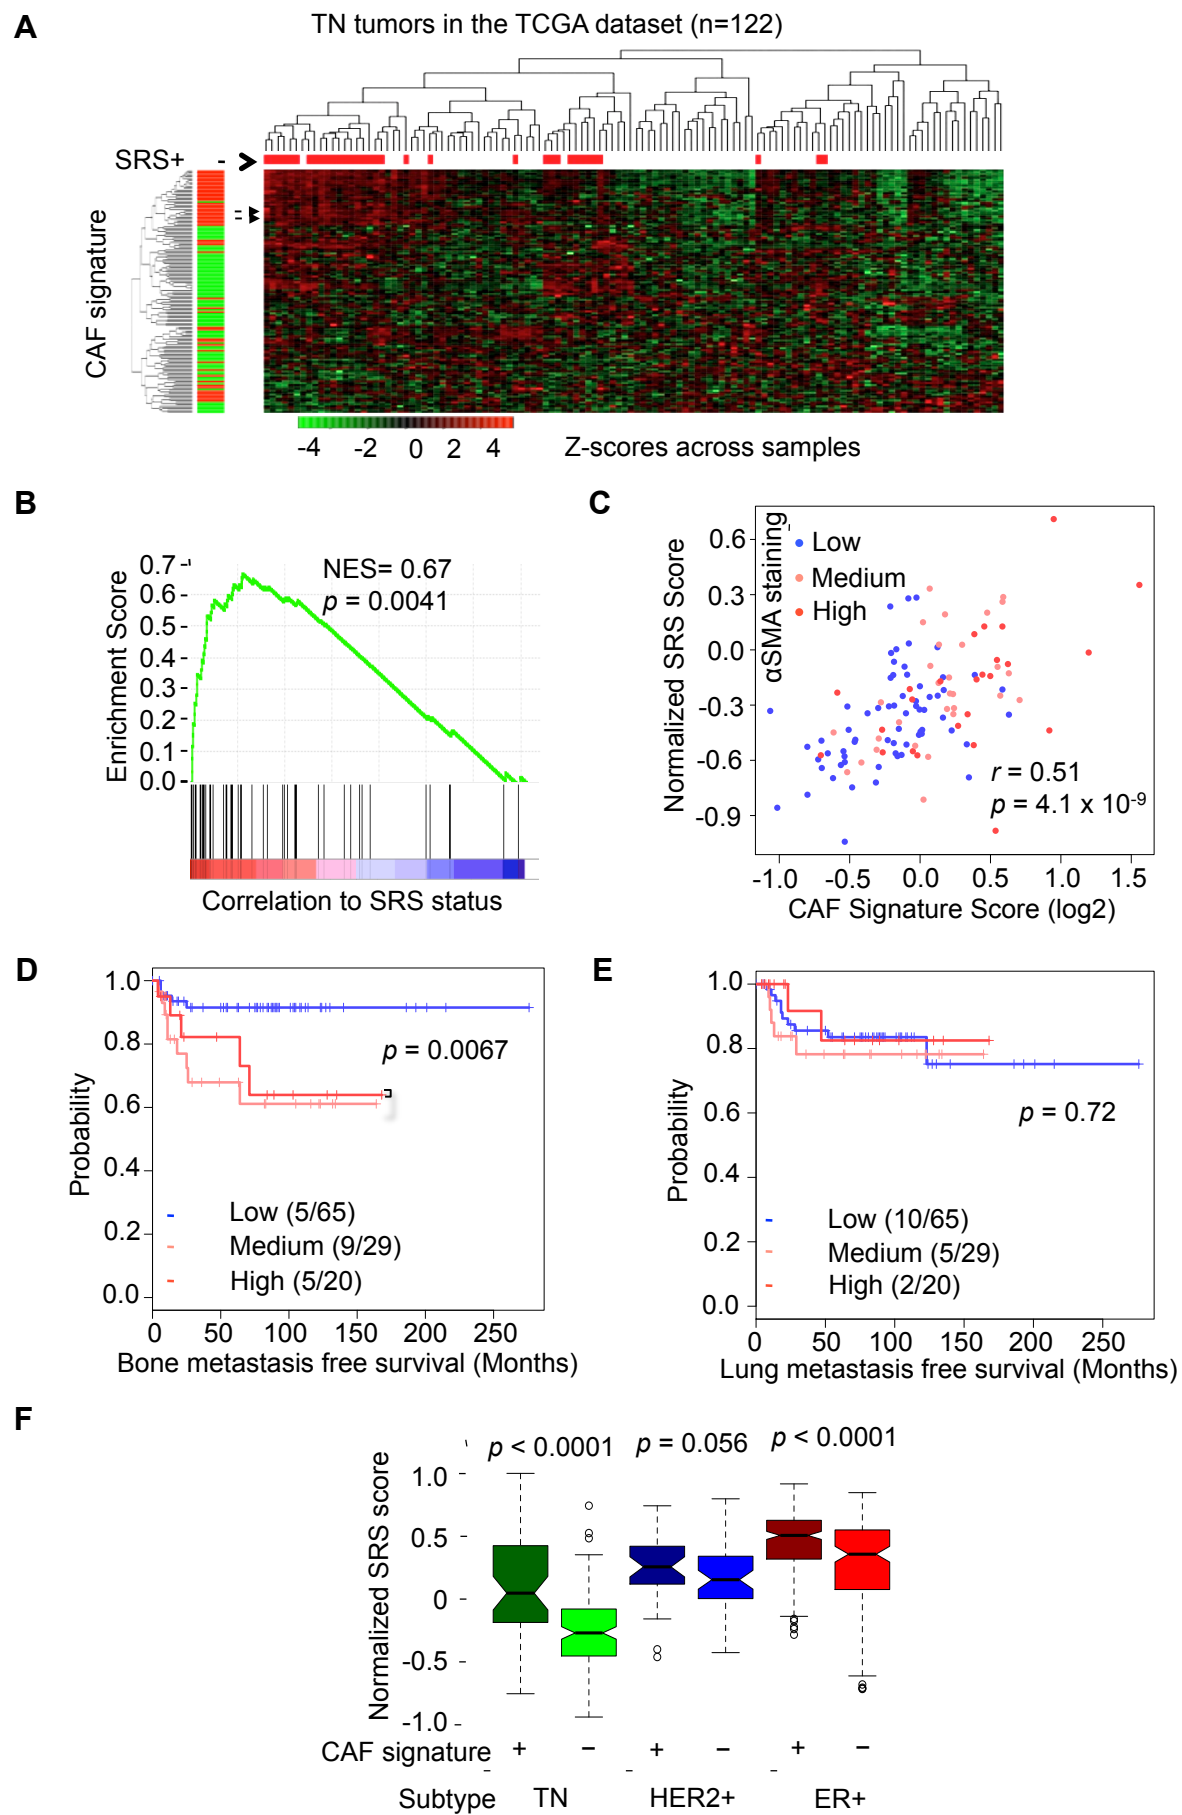

Figure S2, Related to Figure 2

**A**

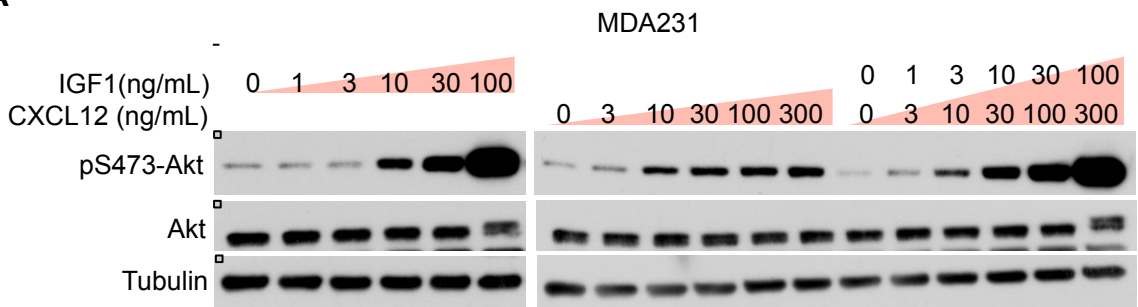

**B**

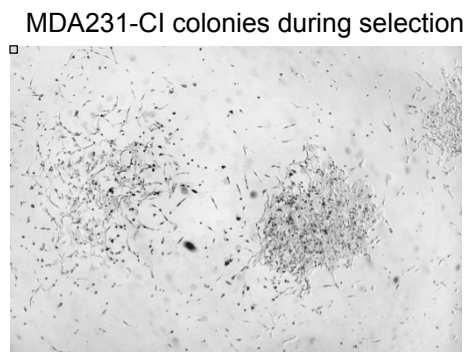

**C**

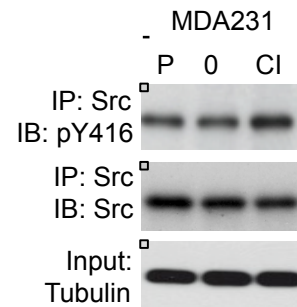

**D**

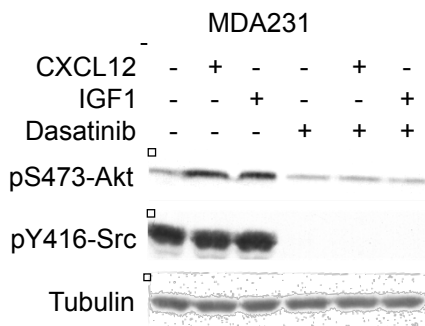

**E**

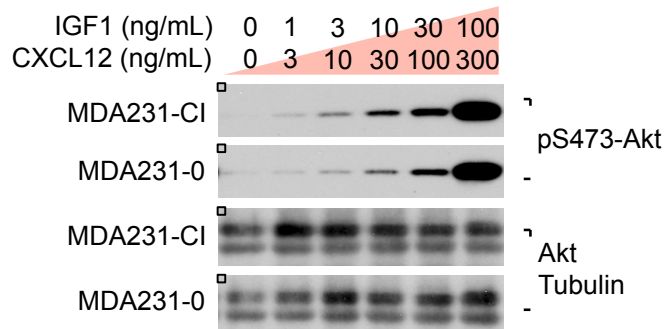

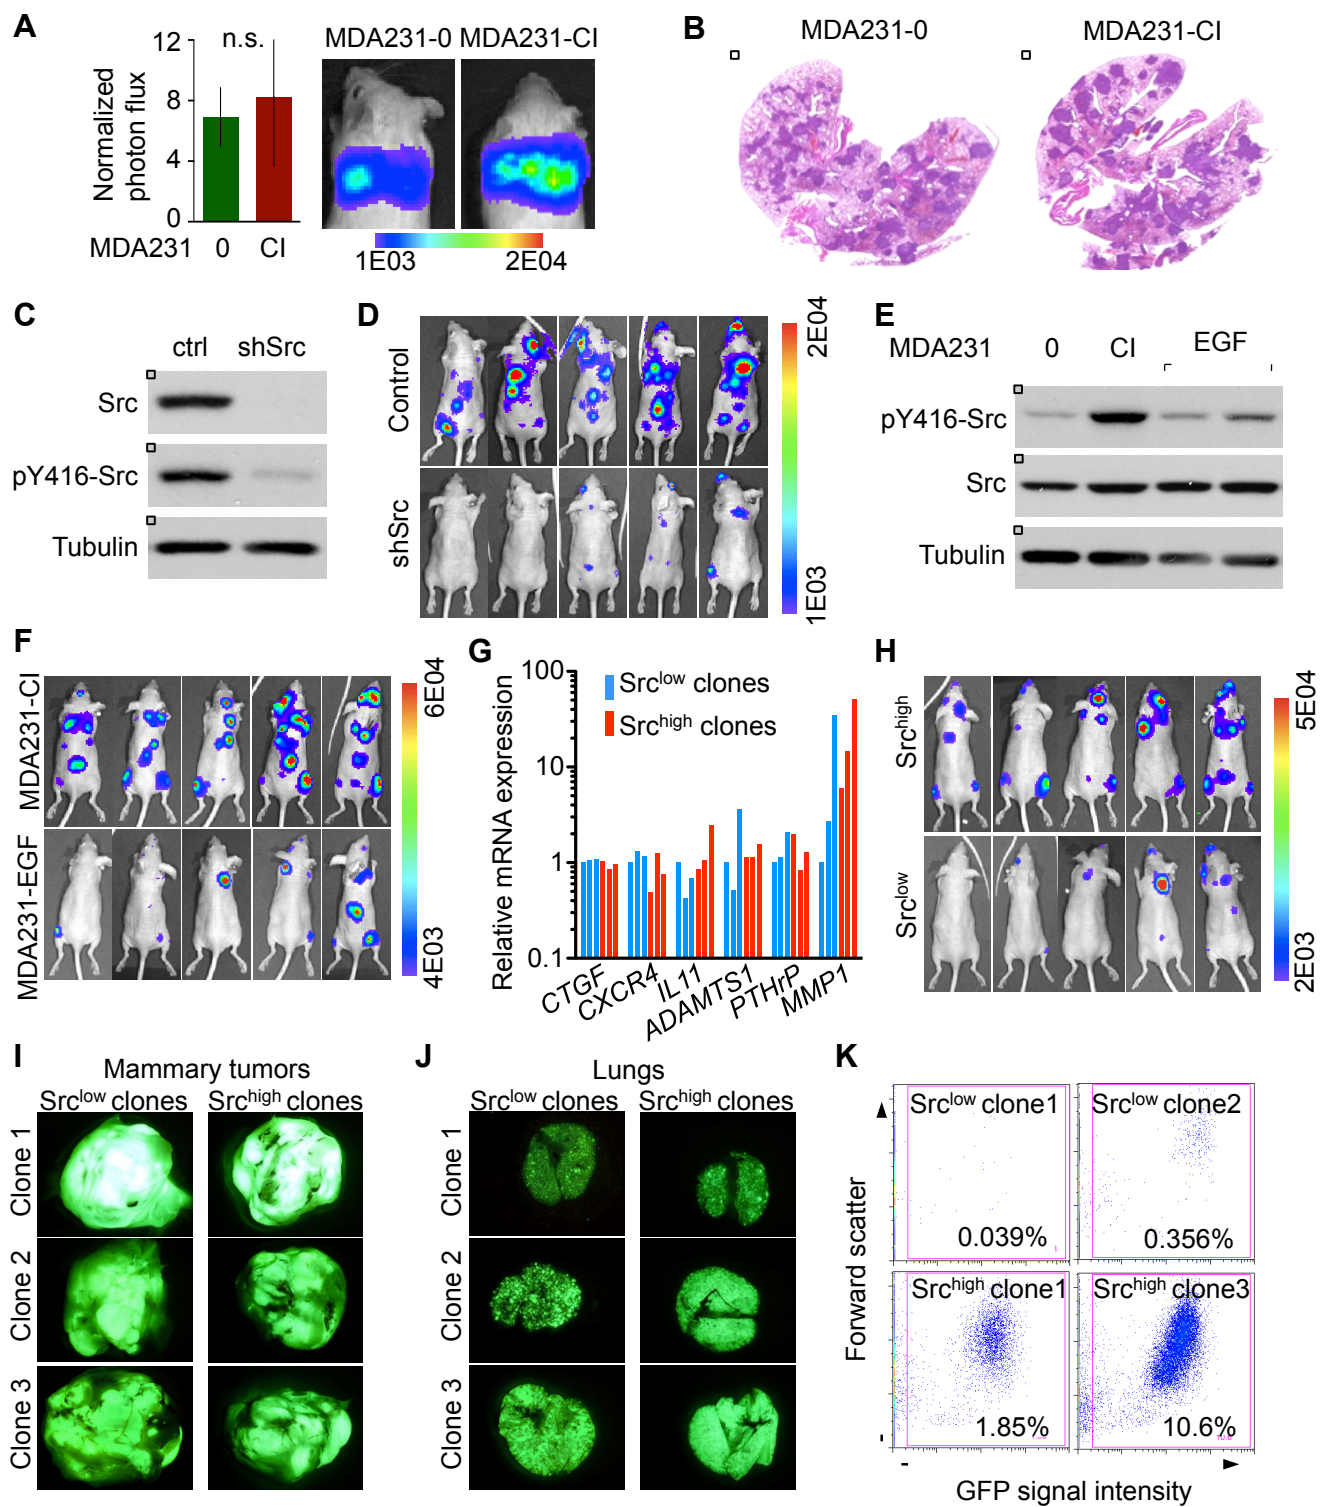

Figure S4, Related to Figure 4

**A**

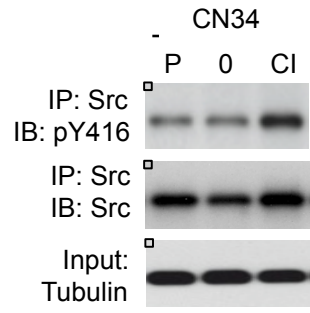

**B**

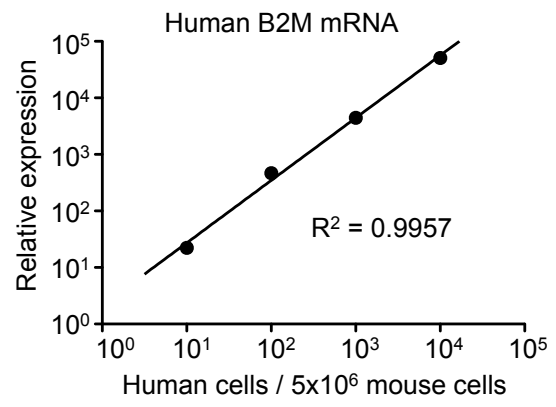

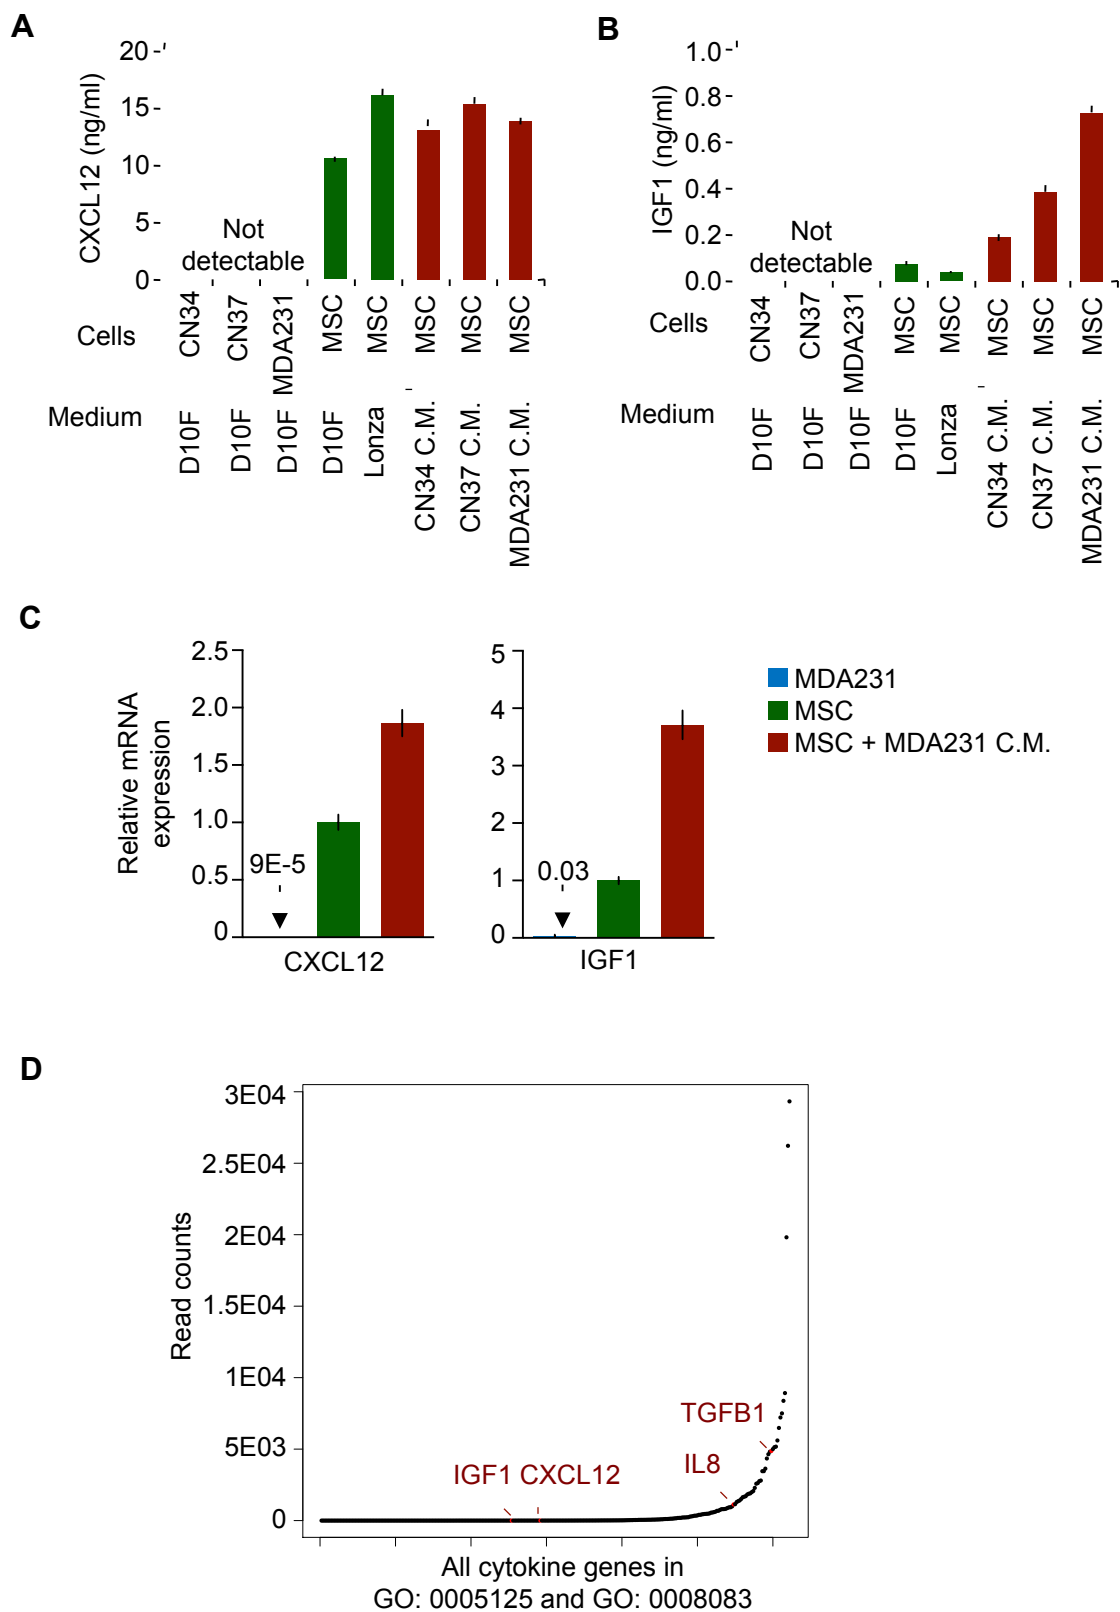

Figure S6, Related to Figure 6

**A**

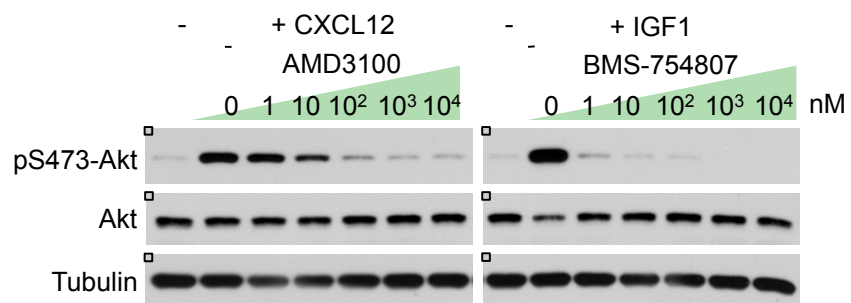

**B**

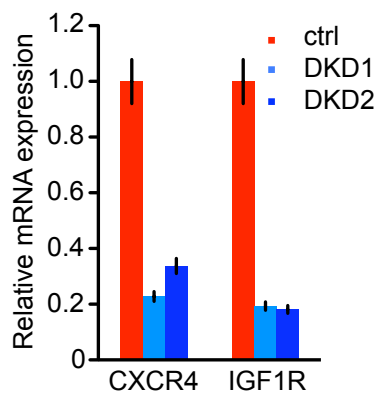

**C**

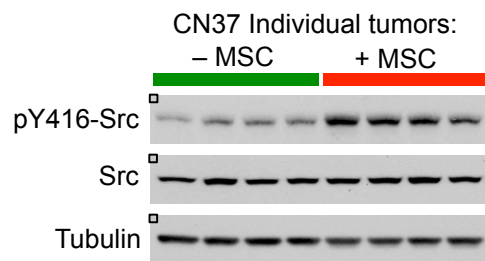

**D**

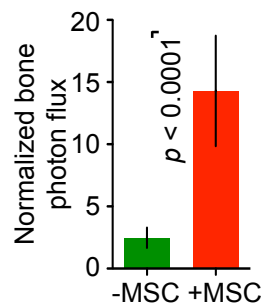

Supplement: NIHMS510873-supplement-02.pdf [file NIHMS510873-supplement-02.pdf]
